# Supplementary material
Source: Springer Nature journal article supplement (https://www.springermedizin.de/resource/supplementary/12933_2011_375_MOESM1_ESM.pdf/9538284)

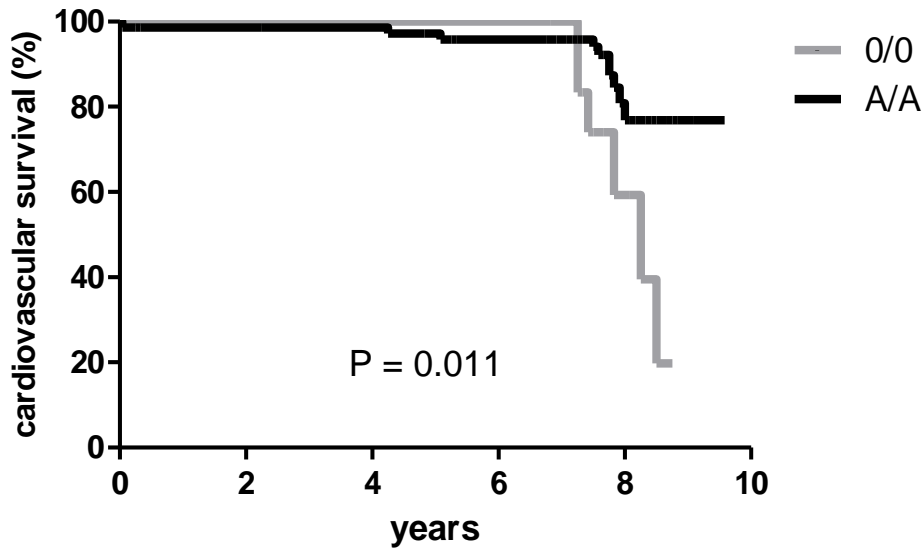

Numbers at risk:

|              |    |    |    |    |    |
|--------------|----|----|----|----|----|
| A/A genotype | 74 | 71 | 70 | 65 | 20 |
| O/O genotype | 13 | 13 | 13 | 13 | 4  |

Supplement: MOESM1 [file 9538284]
